# Supplementary material
Source: PubMed Central journal article supplement (PMC6912119)
Supplement: JVI.01623-19-s0001.pdf [file JVI.01623-19-s0001.pdf]

Supplementary table 1. Sampling location (Municipalities in Espirito Santo and Rio de Janeiro states) of each geo-referenced YFV sequence

| Taxa                                                          | Location                 | Lat       | Long      |
|---------------------------------------------------------------|--------------------------|-----------|-----------|
| MF170972_YFV_Human_EspiritoSanto_Brazil_2017-03-31            | Cariacica                | -20.2643  | -40.4203  |
| MF170974_YFV_Human_EspiritoSanto_Brazil_2017-03-29            | Cariacica                | -20.2643  | -40.4203  |
| MF170978_YFV_Human_EspiritoSanto_Brazil_2017-03-28            | Santa Maria de Jetiba    | -20.09345 | -40.83740 |
| MF170976_YFV_Human_EspiritoSanto_Brazil_2017-01-25            | Laranja da Terra         | -19.90105 | -41.05603 |
| MF170980_YFV_Human_EspiritoSanto_Brazil_2017-03-23            | Alfredo Chaves           | -20.63620 | -40.75006 |
| MF423374_YFV_Mosquito_EspiritoSanto_Brazil_2017-02-23         | Paraju, Domingos Martins | -20.31794 | -40.80577 |
| MF434851_YFV_Human_RiodeJaneiro_Brazil_2017-04-25             | Casimiro de Abreu        | -22.47979 | -42.20290 |
| MF538784_YFV_Human_RiodeJaneiro_Brazil_2017-02-26             | Porciuncula              | -20.96786 | -42.04106 |
| MF538785_YFV_Monkey_RiodeJaneiro_Brazil_2017-04-21            | Araras, Petropolis       | -22.51124 | -43.17793 |
| MF423377_YFV_Monkey_RiodeJaneiro_Brazil_2017-04-19            | Carmo                    | -21.93147 | -42.60760 |
| MF423378_YFV_Monkey_RiodeJaneiro_Brazil_2017-04-19            | Macaee, Sana             | -22.32763 | -42.18427 |
| MF538783_YFV_Human_RiodeJaneiro_Brazil_2017-03-18             | Casimiro de Abreu        | -22.47979 | -42.20290 |
| MF538782_YFV_Human_RiodeJaneiro_Brazil_2017-03-16             | Sao Fidelis              | -21.64937 | -41.74571 |
| MF423376_YFV_Monkey_RiodeJaneiro_Brazil_2017-04-13            | Macaee, Sana             | -22.32763 | -42.18427 |
| MF538786_YFV_Monkey_RiodeJaneiro_Brazil_2017-06-05            | Guapimirim               | -22.53519 | -42.98994 |
| MF423375_YFV_Monkey_RiodeJaneiro_Brazil_2017-04-04            | Macaee, Atalaia          | -22.32763 | -42.18427 |
| YFV_CasimiroDeAbreu_RJ_2019-01-11                             | Casimiro de Abreu        | -22.47979 | -42.20290 |
| LABFLA9_2018-04-24                                            | Silva Jardim             | -22.64761 | -42.39562 |
| LABFLA10_2018-04-24                                           | Silva Jardim             | -22.64761 | -42.39562 |
| BC04_library5_48BC RJ182 NHP RioJaneiro-RJ_2017-03-09         | Rio de Janeiro           | -22.90684 | -43.17289 |
| BC05_library5_48BC RJ193 NHP SaoSebastiaoDoAlto-RJ_2017-03-27 | Sao Sebastiao Do Alto    | -21.95404 | -42.13133 |
| BC06_library5_48BC RJ141 Human Ibatiba-ES_2017-01-24          | Ibatiba                  | -20.23516 | -41.50906 |
| BC16_library5_48BC RJ183 Human RioJaneiro-RJ_2017-03-12       | Rio de Janeiro           | -22.90684 | -43.17289 |
| BC17_library5_48BC RJ194 NHP SaoSebastiaoDoAlto-RJ_2017-03-27 | Sao Sebastiao Do Alto    | -21.95404 | -42.13133 |
| BC18_library5_48BC RJ147 NHP DomingosMartins-ES_2017-01-31    | Domingos Martins         | -20.36079 | -40.65981 |
| BC27_library5_48BC RJ173 NHP Itarana-ES_2017-02-09            | Itarana                  | -19.87458 | -40.87594 |

---

|                                                                                           |                   |           |           |
|-------------------------------------------------------------------------------------------|-------------------|-----------|-----------|
| BC28_library5_48BC RJ184 Human Vitoria-ES_2017-03-13                                      | Vitoria           | -20.29761 | -40.29577 |
| BC49_library5_48BC RJ213 NHP Valenca-RJ_2018-01-22                                        | Valenca           | -22.24595 | -43.70690 |
| BC52_library5_48BC RJ186 NHP Guarapari-ES_2017-03-06                                      | Guarapari         | -20.67411 | -40.49973 |
| BC63_library5_48BC RJ177 Human Brejetuba-ES_2017-02-16                                    | Brejetuba         | -20.14950 | -41.29224 |
| BC76_library5_48BC RJ188 NHP Cariacica-ES_2017-03-08                                      | Cariacica         | -20.2643  | -40.4203  |
| BC77_library5_48BC RJ201 NHP Novalguacu-RJ_2017-11-28                                     | Nova Iguacu       | -22.75613 | -43.46074 |
| BC78_library5_48BC RJ219 NHP AngraDosReis-RJ_2018-02-05                                   | Angra Dos Reis    | -23.00573 | -44.31575 |
| BC88_library5_48BC RJ189 NHP Serra-ES_2017-03-20                                          | Serra             | -20.12289 | -40.30540 |
| BC89_library5_48BC RJ216 NHP DuasBarras-RJ_2018-01-25                                     | Duas Barras       | -22.07081 | -42.51172 |
| MH018110_YFV_Monkey_Brazil_2017_2115_monkey_Cariacica_EspiritoSanto_Brazil_2017-03-09     | Cariacica         | -20.2643  | -40.4203  |
| MH018111_YFV_Human_Brazil_2017_3919_human_DomingosMartins_EspiritoSanto_Brazil_2017-04-10 | Domingos Martins  | -20.36079 | -40.65981 |
| MH018112_YFV_Monkey_Brazil_2017_4278_Monkey_Marica_RioDeJaneiro_Brazil_2017-04-17         | Marica            | -22.91609 | -42.81919 |
| MH018108_YFV_Human_Brazil_2017_1818_Cariacica_EspiritoSanto_2017-03-10                    | Cariacica         | -20.2643  | -40.4203  |
| MH018113_YFV_Human_Brazil_2017_4480_human_CasimiroDeAbreu_RioDeJaneiro_Brazil_2017-04-22  | Casimiro de Abreu | -22.47979 | -42.20290 |
| MH018109_YFV_Monkey_Brazil_2017_2109_monkey_Cariacica_EspiritoSanto_2017-03-08            | Cariacica         | -20.2643  | -40.4203  |
| MH018106_YFV_Monkey_Brazil_2017_532_CoronelMurta_MinasGerais_Brazil_2017-01-13            | Coronel Murta     | -16.58801 | -42.19677 |
| MH018104_YFV_Human_Brazil_2017_465_Human_Itambacuri_MinasGerais_Brazil_2017-01-30         | Itambacuri        | -18.03409 | -41.68334 |
| MH018102_YFV_Monkey_Brazil_2017_438_Monkey_DomingosMartins_EspiritoSanto_2017-01-31       | Domingos Martins  | -20.36079 | -40.65981 |
| MH018105_YFV_Human_Brazil_2017_480_Human_TeofiloOtoni_MinasGerais_Brazil_2017-01-28       | Teofilo Otoni     | -17.86000 | -41.50910 |
| MH018107_YFV_Human_Brazil_2017_1536_human_Vitoria_EspiritoSanto_Brazil_2017-02-22         | Vitoria           | -20.29761 | -40.29577 |
| KY885000_ES-504_Alouattaclamitans_DomingosMartins_EspiritoSanto_Brazil_2017-02-20         | Domingos Martins  | -20.36079 | -40.65981 |
| KY885001_ES-505_Alouattaclamitans_DomingosMartins_EspiritoSanto_Brazil_2017-02-22         | Domingos Martins  | -20.36079 | -40.65981 |
| MH018080_YFV_Human_Brazil_2017_M68_Human_Ladainha_MinisGerais_Brazil_2017-01-28           | Ladainha          | -17.59819 | -41.80044 |
| MH018092_YFV_Human_Brazil_2017_M123_Human_Itambacuri_MinisGerais_Brazil_2017-01-27        | Itambacuri        | -18.03409 | -41.68334 |
| MH018068_YFV_Human_Brazil_2017_M16_human_Caratinga_MinisGerais_Brazil_2017-01-09          | Caratinga         | -19.78886 | -42.13644 |
| MH018094_YFV_Human_Brazil_2017_M164_Human_Simonesia_MinisGerais_Brazil_2017-01-30         | Simonesia         | -20.12242 | -42.00298 |
| MH018079_YFV_Human_Brazil_2017_M58_Human_Itambacuri_MinisGerais_Brazil_2017-01-28         | Itambacuri        | -18.03409 | -41.68334 |
| MH018096_YFV_Monkey_Brazil_2017_M211_Monkey_JoseRaydan_MinisGerais_Brazil_2017-01-13      | Jose Raydan       | -18.22134 | -42.49851 |
| MH018076_YFV_Human_Brazil_2017_M47_Human_Setubinha_MinisGerais_Brazil_2017-01-19          | Setubinha         | -17.60067 | -42.15906 |
| MH018083_YFV_Monkey_Brazil_2017_M79_AlouttaSpp_Abre_Campo_MinisGerais_Brazil_2017-02-17   | Abre Campo        | -20.30013 | -42.47470 |

---

---

|                                                                                       |                      |           |           |
|---------------------------------------------------------------------------------------|----------------------|-----------|-----------|
| MH018095_YFV_Monkey_Brazil_2017_M210_Monkey_Sabinopolis_MinasGerais_Brazil_2017-01-19 | Sabinopolis          | -18.66589 | -43.08160 |
| MH018090_YFV_Human_Brazil_2017_M105_Human_Caratinga_MinasGerais_Brazil_2017-01-12     | Caratinga            | -19.78886 | -42.13644 |
| MH018085_YFV_Human_Brazil_2017_M94_Human_ImbeDeMinas_MinasGerais_Brazil_2017-01-13    | Imbe De Minas        | -19.60220 | -41.96985 |
| MH018078_YFV_Human_Brazil_2017_M51_Human_NovoCruzeiro_MinasGerais_Brazil_2017-01-18   | Novo Cruzeiro        | -17.43289 | -41.99897 |
| MH018070_YFV_Human_Brazil_2017_M18_human_Itambacuri_MinasGerais_Brazil_2017-01-21     | Itambacuri           | -18.03409 | -41.68334 |
| MH018091_YFV_Human_Brazil_2017_M107_Human_NovoCruzeiro_MinasGerais_Brazil_2017-01-30  | Novo Cruzeiro        | -17.43289 | -41.99897 |
| MH018088_YFV_Human_Brazil_2017_M99_Human_TeofiloOtoni_MinasGerais_Brazil_2017-01-21   | Teofilo Otoni        | -17.86000 | -41.50910 |
| MH018089_YFV_Human_Brazil_2017_M100_Human_Ladainha_MinasGerais_Brazil_2017-01-02      | Ladainha             | -17.59819 | -41.80044 |
| MH018074_YFV_Human_Brazil_2017_M36_Human_NovoCruzeiro_MinasGerais_Brazil_2017-01-14   | Novo Cruzeiro        | -17.43289 | -41.99897 |
| MH018084_YFV_Monkey_Brazil_2017_M83_Monkey_Ladainha_MinasGerais_Brazil_2017-02-09     | Ladainha             | -17.59819 | -41.80044 |
| MH018099_YFV_Monkey_Brazil_2017_M218_Monkey_Cordeiros_Bahia_2017-03-10                | Cordeiros            | -15.03780 | -41.93468 |
| MH018077_YFV_Human_Brazil_2017_M48_Human_Ladainha_MinasGerais_Brazil_2017-01-07       | Ladainha             | -17.59819 | -41.80044 |
| MH018072_YFV_Human_Brazil_2017_M26_human_TeofiloOtoni_MinasGerais_Brazil_2017-01-07   | Teofilo Otoni        | -17.86000 | -41.50910 |
| MH018087_YFV_Human_Brazil_2017_M98_Human_TeofiloOtoni_MinasGerais_Brazil_2017-01-10   | Teofilo Otoni        | -17.86000 | -41.50910 |
| MH018073_YFV_Human_Brazil_2017_M35_human_TeofiloOtoni_MinasGerais_Brazil_2017-01-20   | Teofilo Otoni        | -17.86000 | -41.50910 |
| MH018103_YFV_Human_Brazil_2017_460_human_NovoCruzeiro_MinasGerais_Brazil_2017-01-30   | Novo Cruzeiro        | -17.43289 | -41.99897 |
| RJ162_NHP_ChapadaGaucha-MG_2017-01-23                                                 | Chapada Gaucha       | -15.56940 | -45.37453 |
| RJ150_Human_TeofiloOtoni-MG_2017-01-27                                                | Teofilo Otoni        | -17.86000 | -41.50910 |
| RJ148_Human_TeofiloOtoni-MG_2017-01-24                                                | Teofilo Otoni        | -17.86000 | -41.50910 |
| RJ157_Human_TeofiloOtoni-MG_2017-02-05                                                | Teofilo Otoni        | -17.86000 | -41.50910 |
| RJ153_NHP_FelicianoDosSantos-MG_2017-01-24                                            | Felicio Dos Santos   | -18.07791 | -43.25037 |
| MH018114_YFV_Monkey_Brazil_2017_8_monkey_Itarana_EspiritoSanto_Brazil_2017-01-24      | Itarana              | -19.87458 | -40.87594 |
| RJ168_NHP_Divinopolis-MG_2017-01-23                                                   | Divinopolis          | -20.10344 | -44.97167 |
| RJ185_Human_SaoJoaoEvangelista-MG_2017-01-22                                          | Sao Joao Evangelista | -18.54848 | -42.76587 |
| RJ151_NHP_Itamarandiba-MG_2017-01-13                                                  | Itamarandiba         | -17.85729 | -42.85839 |

---
